# Supplementary material for: A novel heterometallic compound for design and study of electrical properties of silver nanoparticles-decorated lead compounds
Source: Royal Society of Chemistry journal article supplement (doi:10.1039/c7nj03682e), 2017-12-12
Supplement: c7nj03682e1.pdf [file c7nj03682e1.pdf]

**New Journal of Chemistry**

**Supplementary file**

**A novel heterometallic compound for design and  
electrical properties of silver nanoparticles decorated  
lead compounds**

**A. M. Nassar <sup>a, b</sup>, E. F. Abo Zeid <sup>c</sup> and A. M. Elseman <sup>d, e\*</sup>, N. F.**

**Alotaibi <sup>a</sup>**

<sup>a</sup> Chemistry Department, college of Science, Aljouf University, Sakaka, Aljouf, Saudi Arabia.

<sup>b</sup> Chemistry Department, Faculty of Science, Al-Azhar University, Cairo, Egypt.

<sup>c</sup> Physics Department, Faculty of Science, Assiut University, Assiut, 71516, Egypt.

<sup>d</sup> State Key Laboratory of Alternate Electrical Power System with Renewable Energy Sources, North China Electric Power University, Beijing 102206, China.

<sup>e</sup> Electronic and Magnetic Materials Department, Advanced Materials Division, Central Metallurgical Research & Development Institute (CMRDI), P.O.Box 87 Helwan, 11421, Cairo, Egypt.

\*: Corresponding author. (A. M. Elseman) Email: [AhmedMourtada5555@yahoo.com](mailto:AhmedMourtada5555@yahoo.com);

[amourtada@cmrdi.sci.eg](mailto:amourtada@cmrdi.sci.eg); [amourtada@ncepu.edu.cn](mailto:amourtada@ncepu.edu.cn)

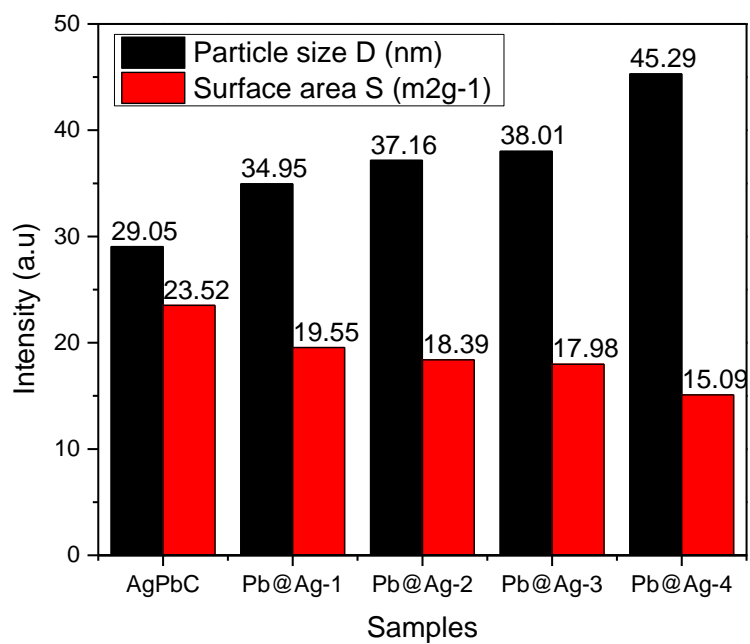

Figure S1 relation between particle sizes and surface area for the composite materials.

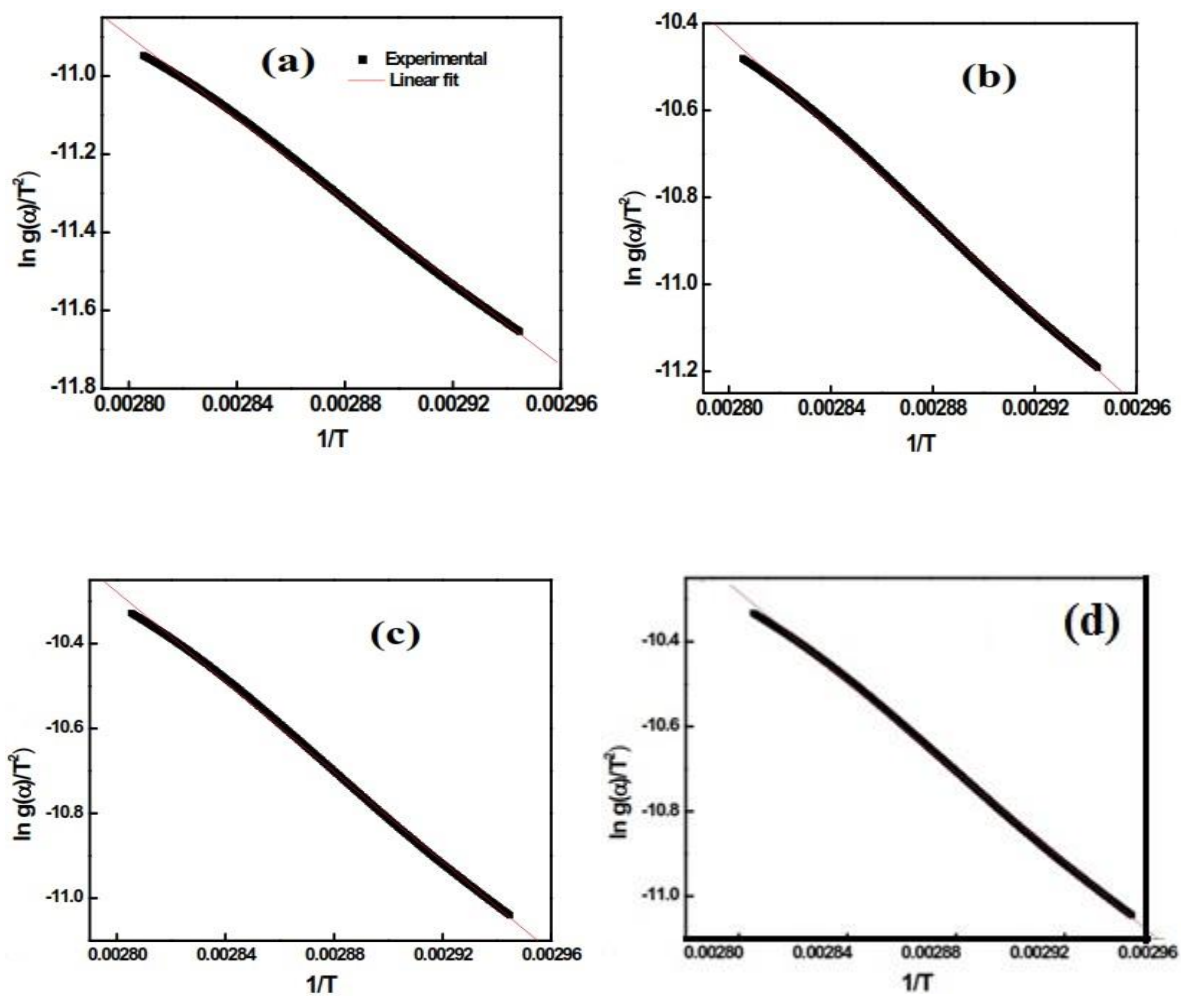

Figure S2 Linearization curves obtained by Coats-Redfern method for (a) AgPb-1 and its calcination products, (b) AgPb-2, (c) AgPb-3 and (d) AgPb-5 samples.

**Table S1** Thermodynamic parameters from TGA of the studied composites.

| Compound | Decomposition range (°C) | $E^*$ (kJ mol <sup>-1</sup> ) | $A$ (S <sup>-1</sup> ) | $S^*$ (kJ mol <sup>-1</sup> ) | $H^*$ (kJ mol <sup>-1</sup> ) | $G^*$ (kJ mol <sup>-1</sup> ) |
|----------|--------------------------|-------------------------------|------------------------|-------------------------------|-------------------------------|-------------------------------|
| AgPb-1   | 20-135                   | 3205.0082                     | 7.23E-05               | -.3646                        | 1.8081681                     | 125652.17                     |
|          | 136-234                  | 27039.404                     | 5.01E+00               | -.4173                        | 23095.724                     | 134683.55                     |
|          | 235-381                  | 15327.606                     | 1.63E-01               | -.7935                        | 10360.566                     | 169039.27                     |
|          | 382-800                  | 13597.95                      | 7.16E-04               | -.2945                        | 7757.3098                     | 226988.07                     |
| AgPb-2   | 20-380                   | 21480.018                     | 6.68E-02               | -.1934                        | 16537.938                     | 178814.82                     |
|          | 381-800                  | 14250.29                      | 1.58E-04               | -.7626                        | 7752.3704                     | 262172.96                     |
| AgPb-3   | 20-331                   | 2826.5476                     | 2.94E-06               | -.9813                        | -1766.092                     | 194735.6                      |
|          | 332-574                  | 9642.3353                     | 2.06E-04               | -.7069                        | 3019.6153                     | 260690.3                      |
|          | 575-800                  | 18636.984                     | 9.75E-06               | -.5934                        | 10683.064                     | 345850.39                     |
| AgPb-5   | 20-491                   | 6899.1896                     | 5.20E-06               | -.8571                        | 1957.1096                     | 210960.2                      |
|          | 492-602                  | 151321.33                     | 3.39E-06               | -.3303                        | 144507.25                     | 249609.8                      |
|          | 603-800                  | 20506.291                     | 1.34E-05               | -.6716                        | 13692.211                     | 297616.25                     |

**Table S2** Comparison of Electrical conductivity and dielectric constant parameters for different materials

| Sample                                                | Electrical conductivity<br>$\sigma$ (S/m) | Dielectric constant | Ref. |
|-------------------------------------------------------|-------------------------------------------|---------------------|------|
| polymeric material                                    | $0.3 \times 10^1$                         | 10                  | 1    |
| Ag                                                    | $6.3 \times 10^7$                         | 15                  | 2    |
| Ag/polyimide                                          | $4.2 \times 10^5$                         | 400                 | 3    |
| Ag/BaTiO <sub>3</sub> /PI                             | $3.3 \times 10^6$                         | 1500                | 4    |
| Ni/BaTiO <sub>3</sub> /polyvinylidene fluoride (PVDF) | $3.5 \times 10^6$                         | 800                 | 5    |
| Ag/graphene oxide                                     | $1.0 \times 10^7$                         | 64                  | 6    |
| TiO <sub>2</sub> -GO-PVDF-HFP                         | $4.1 \times 10^5$                         | 18                  | 7    |
| GO/Au-PVDF                                            | $7.3 \times 10^7$                         | 39                  | 8    |
| GO/Cu-PVDF                                            | $6.8 \times 10^7$                         | 50                  | 8    |
| PVDF-GO                                               | $5.2 \times 10^6$                         | 30                  | 9    |
| PbO                                                   | $1.3 \times 10^2$                         | 25                  | 10   |
| SiO <sub>2</sub>                                      | $1.0 \times 10^3$                         | 3.9                 | 11   |
| Al <sub>2</sub> O <sub>3</sub>                        | $0.4 \times 10^2$                         | 8.5 to 10           | 12   |

#### References

1. L. Yang, J. Qiu, H. Ji, K. Zhu and J. Wang, *Composites Part A: Applied Science and Manufacturing*, 2014, **65**, 125-134.
2. P. B. Johnson and R.-W. Christy, *Physical review B*, 1972, **6**, 4370.
3. M.-J. Jiang, Z.-M. Dang, S.-H. Yao and J. Bai, *Chem. Phys. Lett.*, 2008, **457**, 352-356.
4. N. G. Devaraju and B. I. Lee, *J. Appl. Polym. Sci.*, 2006, **99**, 3018-3022.
5. Z.-M. Dang, Y. Shen and C.-W. Nan, *Appl. Phys. Lett.*, 2002, **81**, 4814-4816.
6. S. Moharana and R. N. Mahaling, *Chem. Phys. Lett.*, 2017, **680**, 31-36.
7. Y. Shao, M. F. El-Kady, L. J. Wang, Q. Zhang, Y. Li, H. Wang, M. F. Mousavi and R. B. Kaner, *Chem. Soc. Rev.*, 2015, **44**, 3639-3665.
8. P. Fakhri, H. Mahmood, B. Jaleh and A. Pegoretti, *Synth. Met.*, 2016, **220**, 653-660.
9. M. A. Rahman, B.-C. Lee, D.-T. Phan and G.-S. Chung, *Smart Mater. Struct.*, 2013, **22**, 085017.
10. D. H. Kang and K. H. Yoon, *Ferroelectrics*, 1988, **87**, 255-264.
11. S. Geis, B. Müller and J. Fricke, *J. Porous Mater.*, 2000, **7**, 423-433.
12. C.-f. Liao, Y.-f. Jiao, X. Wang, B.-q. Cai, Q.-c. Sun and H. Tang, *International Journal of Minerals, Metallurgy, and Materials*, 2017, **24**, 1034-1042.
